# Supplementary material for: Novel transcripts discovered by mining genomic DNA from defined regions of bovine chromosome 6
Source: PubMed Central journal article supplement (PMC2681481; doi:10.1186/1471-2164-10-186), 2009-04-24
Supplement: 1471-2164-10-186-S1.pdf [file 1471-2164-10-186-S1.pdf]

| Locus         | BAC ID        | Clone ID | Insert Size [bp] | ETS_ID                     | Accession number            | Primer (forward)                | Primer (reverse)              |
|---------------|---------------|----------|------------------|----------------------------|-----------------------------|---------------------------------|-------------------------------|
| <b>FBNS4</b>  | BBI_750F05243 | ES4/7    | 63               | 20835                      | ET201800                    | CAA AAA TGG ACA AAA ACA AAG ATG | GGT TTT TTG ACA ACT TTC GAT G |
|               |               | ES4/10   | 120              | 20837                      | ET201805                    | C TTT GCG ACC CCA TGA ACC       | TGG ACA TGA GTT TGA GTG AAG   |
|               |               | ES4/35   | 71               | 20849                      | ET201802                    | CAG CGG GGT TGT TAA TGA AG      | TCC CTG TGG AAA GAA CTG C     |
|               |               | ES4/56   | 114              | 20853                      | ET201801                    | AGT GGG GCT GTC TGT CTC AG      | ACT GTG ACT CGG GGG ATG G     |
|               |               | EB4/9    | 143              | 20858                      | ET201803                    | AGA TGA CAA AGC TAC GCT GG      | TG TGA GGG TGG TAC TGT GTC    |
|               |               | EB4/27   | 213              | 20866                      | ET201804                    | GGT CTT TCT ATT TTG CTT CGG     | TGT CTG GGA GCA TCT TCT TTG   |
| <b>BMS382</b> | BBI_750F06108 | EB7/6    | 67               | 25314                      | ET201811                    | ATT AGA TAA TCT GTT CCA CTT C   | CTC AAG TCA TAA ATG TGG AAC   |
|               |               | EB7/8    | 108              | 25315                      | ET201810                    | ATC CAG ATG TAG CTG CAT ACG     | TCA AAG GGG TAG TTT CCT TGC   |
|               |               | EB7/89   | 86               | 25324                      | ET201812                    | CAA TGA TAA TTT CGG TCC GTC     | GTT CAT GCA GTA CTA TTA GCC   |
|               |               | ES7/17   | 121              | 25614                      | ET201813                    | GGT CAT CTT ACT AGT GTA TGC     | TCC CAG ATG GTT CTA CAA GG    |
|               |               | ES7/30   | 105              | 25618                      | ET201809                    | GGT GGT ATC ATC TAC ATG CC      | CAG GAC ACG TCA TGC AAA G     |
|               |               | ES7/57   | 121              | 25624                      | ET201806                    | AGA AAT CAG ACA ACT TTA ATC C   | TCG CCT TGC AGT TAT TTG TC    |
|               |               | ES7/76   | 88               | 25626                      | ET201807                    | TTA GTC GGC CAA GTC TAT TC      | TCA AGT TCA AAG GCA GTT TTC   |
|               |               | EB9/10   | 162              | 25599                      | ET201819                    | TCT TTC CAT GAG AGA GAT GAG     | TCT TTC CAT GAG AGA GAT GAG   |
|               |               | EB9/58   | 176              | 25609                      | ET201820                    | GCT GAA AAT GGG TTC TTG TC      | CTC CGA GAT TTA ATT TGG CAC   |
|               |               | ES7/12   | 35               | 25612                      | ET201817                    | No primer                       | No primer                     |
|               |               | ES7/13   | 46               | 25613                      | ET201815                    | No primer                       | No primer                     |
|               |               | ES7/32   | 46               | 25619                      | ET201814                    | No primer                       | No primer                     |
|               |               | EB7/11   | 118              | 25316                      | ET201808                    | No primer                       | No primer                     |
|               |               | EB7/21   | 53               | 25319                      | ET201816                    | No primer                       | No primer                     |
| EB7/5         | 45            | 25313    | ET201818         | No primer                  | No primer                   |                                 |                               |
| <b>FBN12</b>  | BBI_750M16219 | ES2/2    | 89               | 20308                      | ET201827                    | CGT AGC CTG GAT AAA TGA AGT TG  | TTT GTG TTC CCA GAA GGT AGC   |
|               |               | ES2/3    | 84               | 20309                      | ET201826                    | CAA TTC CTC GGT TTT GTT TTG     | GAA GTC CCT TAA TTG TTG ATT G |
|               |               | ES2/5    | 87               | 20311                      | ET201825                    | GAA GAA AAT AAA ATA TAC AGA CTC | GGT GAT ATG GTC CAG GTG TC    |
|               |               | ES2/56   | 112              | 20687                      | ET201821                    | ACT CTT CTG TCC ATG GGA TTC C   | AGG CGA TGC AGG TTT GTT TTC   |
|               |               | ES2/113  | 79               | 21395                      | ET201823                    | CAT GGA GAT CCA AGA GTA AGC     | AGG TTT TAC CCC ACA GAC TTC   |
|               |               | ES2/8b   | 78               | 20565                      | ET201828                    | ATT TCC ATT TTA ATG ATG AGG AC  | CTG TAT GAT TCA GGA CAA AGT G |
|               |               | ES2/60   | 197              | 20691                      | ET201829                    | CCC NGT AGA AGG AAA TGG CAC     | TCT TAT GAT GGG TGC TGG ATG   |
|               |               | ES2/7b   | 76               | 20708                      | ET201822                    | CTC AGC TGG TAA GAA TCT GCG     | ATC TTC CTG ACC CAG GAA TG    |
| EB9/8         | 116           | 25598    | ET201824         | CAC ATT CTT TAC CAG CTG AG | AAA ACA TTC TTA GCC TGC TTG |                                 |                               |
| <b>BM143</b>  | BBI_750F22162 | EB3/2    | 69               | 20395                      | ET201835                    | CAG CTT AGT GCT TGA GGT CC      | AGT TCT CTT TTG CAT GTA GGG   |
|               |               | EB3/5    | 120              | 20396                      | ET201833                    | AGT GAG TCA AGA AAG CCA GTG     | CAT AAT GAA GTT CTG CTC TCC   |
|               |               | EB3/12   | 45               | 20400                      | ET201834                    | No primer                       | No primer                     |
|               |               | ES3/3    | 95               | 21685                      | ET201832                    | CAT TAC TGT GTC TGA AGT CTC     | TCT TCA AGG AAA GAA TTC AAC   |

|               |               |             |     |       |          |                                |                                |
|---------------|---------------|-------------|-----|-------|----------|--------------------------------|--------------------------------|
|               |               | ES3/9       | 185 | 21687 | ET201837 | CAA ACT CAA GAA CAA TGC TAT G  | TGG GTT TGA TTC CTG GGT TG     |
|               |               | ES3/10      | 176 | 21688 | ET201836 | AGA GAT GGG GGT TCA GTC C      | TGA TGT TGT TGA AGT TTA GTT G  |
|               |               | ES3/35      | 315 | 21696 | ET201831 | CAG TTA TAT ACA GTA CCC TGG    | ATG TAG CAT TTC CTC CTC TTG    |
|               |               | ES3/38      | 67  | 21697 | ET201830 | GCA TGA AAA ATC AAA CCA AAC AT | ATT CTT ATA GCA GGT TCC CAG    |
| <b>FBNS10</b> | BBI_750J07162 | ES6/11      | 130 | 25283 | ET201842 | AAG AAA CTC TTC ATC ATC CAG    | TGA GCA TGA ATG TGG GTT TC     |
|               |               | ES6/22      | 116 | 25285 | ET201839 | GTT AGG AGC CTT CTG GTG TG     | AGA AGA ATG TAG ACA GGT AGG    |
|               |               | ES6/72      | 92  | 25292 | ET201841 | GTG CCT GTC TCC TTC TTT TG     | CAC AGT CAT GTG AAT TCA TG     |
|               |               | ES6/78      | 117 | 25294 | ET201843 | GGC ATG ATG AGG GAT CCT G      | TCC ATC CTG ACT TGT TTT CTC    |
|               |               | ES6/36      | 47  | 25257 | ET201838 | No primer                      | No primer                      |
|               |               | EB6/6       | 94  | 25299 | ET201840 | AAA TAA AAC ATG TAA TAC CAA AG | CTG TCT CCT ATA ATT GGA TTG    |
|               |               | EB6/25      | 239 | 25303 | AY839826 | GAA GGC CAA AAT ATC ACC TG     | TCT TGT TAT CTG TAC CGC TTG    |
|               |               | EB6/78      | 256 | 25310 | AY839825 | CGA CAC TCA GAG TCA TGT G      | CTC TTT TGG GAT TTT GAA CAG    |
| <b>BL1099</b> | BBI_750C04346 | EB10/6      | 112 | 22258 | ET201844 | GTA AGC TGA GTC CCC AGT G      | ACT TTG GTC CTA TCA CGA ATC    |
|               |               | ES10/10     | 149 | 26267 | ET201847 | AAC TGA TGA TTA TAC AAC TCA G  | ACA CTC CCA TAA TAT ACA TTC C  |
|               |               | ES10/28     | 191 | 23268 | ET201840 | ACG AAT GGA CCT CAT AGA AGC G  | TGA ACG TGG AGT AGC TCC TCT C  |
|               |               | ES10/73     | 160 | 26271 | ET201845 | GAA CTG CAT ACA GCA TAG TCC    | GTT GGC AAA GTG ATG TCT CTG    |
| <b>TGLA37</b> | BBI_750B13346 | EB15/5      | 84  | 22268 | ET201850 | C ACT TGA CCA TCT GGA AGT TTA  | CTC ACA CAC TAG TAA AGT AAT G  |
|               |               | EB15/6      | 97  | 22269 | ET201851 | AGA CTC TGA TGC TGG GAG GA     | GAG TCA GTG ATG CCA TCC AG     |
|               |               | EB15/87     | 98  | 22277 | ET201852 | GCA GGA AAG AGC AGA TTG TC     | CAC ATC AGG GCA GGG GCA G      |
|               |               | ES15/54     | 176 | 26264 | ET201848 | ATC ATT GAT CTG GAA AGA TGC    | CAC ACA GGC TTC AGT GAT TG     |
|               |               | ES15/24     | 206 | 26263 | ET201849 | CAC AGG CTC TCC ACC CTC C      | GGT ACA AAA GCT GCA TCA TAG    |
| <b>TGLA37</b> | BBI_750E07177 | EE07177-1   | 95  | 15335 | ET201854 | ACA AAA TCT TAG TCG ATG TTG TC | TTT ATG TAT GAC CAC CAG CAA C  |
|               |               | EE07177-5   | 218 | 15338 | ET201855 | CAA CAA CAC AAG AGA GAT GGT C  | CCG ATC TTG TTT TTG CTG GC     |
|               |               | E207177/2-2 | 350 | 16062 | ET201853 | AAA TTT GGC TTT GGA ATA TGG    | TTG GCT GCA AAG AAT AAT CAA    |
|               |               | E207177/2-6 | 55  | 16065 | ET201856 | No primer                      | No primer                      |
| <b>BMS518</b> | BBI_750E20138 | EB20/1      | 137 | 26308 | ET201857 | GCA ATA TAT ATT AGC TCC TGG    | GTC CAT CAA GTC AAT GAT GCC    |
|               |               | EB20/8      | 90  | 26342 | ET201858 | AAT GGA TTT CTT GCA GCA CC     | GTA CAG TCT TCC TTG TCT CC     |
|               |               | EB9/1       | 225 | 25582 | ET201860 | GGT TGA CCA GTT TTC CCA G      | ACA ACT TAT CTT CAA CAA AGG    |
|               |               | ES9/3       | 59  | 25584 | ET201859 | CAT CCA TTA GAT GCC TCC TC     | TCT TGA AAA GTA CAG TAG TTC    |
|               |               | EB20/45     | 42  | 26352 | ET201861 | No primer                      | No primer                      |
| <b>FBNS13</b> | BBI_750K15348 | EB18/6      | 89  | 25328 | ET201862 | AAT CCT TTG CAG AAA AAC TTT G  | ATA GTT TCT CTC CAT AGA TTA C  |
|               |               | EB18/8      | 94  | 25329 | ET201864 | ATG TGT GGC ATC ATG AAT CTC    | TAT CTG TTG TGA CCA TTT TCC    |
|               |               | EB18/49     | 109 | 25336 | ET201863 | TTT GAA AGT GCT CAA CTG GAG    | ACA TCC TGG AAT GTG AAG TCC    |
| <b>FBN13</b>  | BBI_750M0258  | EM0258-57   | 162 | 14638 | ET201867 | CTT TGAGCC AAG AGT AAC TGC     | TCT TTT GTC CAT GGG ATT TTC    |
|               |               | E2M0258-4   | 68  | 15495 | ET201866 | CTT CCC TGA TGG CTC AGA TGA    | AAT AGA ATC CAG GTC TCT CAC AG |

|               |              |              |          |           |           |                               |                               |
|---------------|--------------|--------------|----------|-----------|-----------|-------------------------------|-------------------------------|
|               |              | E2M0258-6    | 126      | 15498     | ET201865  | ACA GTC AGC AAA AAC AAG ACT G | GAA TGG TCT AGT GGT TTT CCT T |
| <b>FBN13</b>  | BBI_750B0172 | E2B0172-2    | 142      | 15239     | ET201868  | CAA TTC TCT GTG CCA AAC TG    | GAG ACA TAA GTG CCA TTG GTA G |
|               |              | E2B0172/1-12 | 69       | 16035     | ET201869  | TTT ATT TAA GCT GGA AGA GAC   | GTC TGA ATT TTA TGT TGG GG    |
|               |              | E3B0172/1-14 | 241      | 16037     | ET201870  | TTA TGG CAA ATA GAT GGA AAA C | TTT TCT TAA AAG AAG CAA GCC   |
|               |              | E3B0172/1-18 | 143      | 16041     | ET201871  | TC TGT CCA TGG AAA TCT G      | GTC TAG TGG CTC AGA TGG C     |
|               |              | E3B0172/1-20 | 233      | 16042     | ET201872  | CAG TCG TGT CTG ACC CCA C     | TGC CCA TAG GGT CAC ACA G     |
|               |              | E2B0172-9    | 57       | 15246     | ET201873  | GCC TTA GTG AAG AAC TAC       | GGT CTG GTA TCT CTT ATG TCT   |
|               |              | E3B0172/1-35 | 172      | 16667     | ET201874  | TGC ATC TGC AGT AGA TAA ACC   | TTT ACA CTG ACC CTG TAG ATC C |
| <b>BM4528</b> | BBI_750A1391 | ES5/5        | 203      | 20746     | ET201881  | GCT CAC CTG TCC TTC ACT ATC   | TTC GAG ATT TTC CAA ACT CAG   |
|               |              | ES5/12       | 120      | 20748     | ET201875  | TGA TAT TTG TAT ACC TCC AGA C | TTA TAT CAG AAT GCT CTC CAA G |
|               |              | ES5/13       | 202      | 20749     | ET201877  | CCT GCG CGG AAC CTT ACC       | GA AGA GAC TCG AGC GCA AG     |
|               |              | ES5/15       | 126      | 20751     | ET201882  | GAG AGA CAC AGG AAG GAG AAT G | TGA CTG TTG GTC TTT AGC ACT G |
|               |              | ES5/23       | 218      | 20758     | ET201883  | GGA GGT TTG TTC TAC TGG AGG   | CTG TGG CCA CTG CTG AGT TTC   |
|               |              | EB5/9        | 106      | 23434     | ET201878  | GAC TCT GAT GCT GGG AGG AAT   | CCA TCG AGT CAG TGA TGC C     |
|               |              | EB5/12       | 162      | 23435     | ET201879  | GAT TCT GCA GGC AAG GCT G     | CTG ATG GTA AAG AAT CTG CTG   |
|               |              | EB5/66       | 94       | 23447     | ET201880  | CTC CTG AAT CAG AAC AGT GAT G | AGG AGG ATG CCT TGG GAG       |
|               |              | EB5/16       | 74       | 23437     | ET201884  | No primer                     | No primer                     |
| EB5/18        | 54           | 23438        | ET201876 | No primer | No primer |                               |                               |
| <b>FBN14</b>  | BBI_750C1821 | EC1821-6     | 212      | 15328     | ET201889  | GAA GGA CTG ATG AGA AAC AAT G | TTC TTC TCA TCT TTC ATC CAT C |
|               |              | EC1821/2-2   | 108      | 16048     | ET201888  | CCA ACA AGG GTA GAA GAA AAG   | ATG CAG GTT CGA TCT CCG TG    |
|               |              | EC1821/2-4   | 224      | 16050     | ET201887  | CAG TTT GGA TCC CTG AGT CTG   | TCA ACT CTT TGC AAG CCA CAG   |
|               |              | EC1821/2-8   | 48       | 16053     | ET201885  | CAG CAG ACG CTT TAC CCT C     | CTC CAT ACA CAG CGG CTT C     |
|               |              | EC1821/1-30  | 151      | 16662     | ET201886  | AAA TTT GGC TTT GGA ATA TGG   | TTG GCT GCA AAG AAT AAT CAA   |
