# Supplementary material for: Novel transcripts discovered by mining genomic DNA from defined regions of bovine chromosome 6
Source: PubMed Central journal article supplement (PMC2681481; doi:10.1186/1471-2164-10-186), 2009-04-24
Supplement: 1471-2164-10-186-S2.pdf [file 1471-2164-10-186-S2.pdf]

| Locus on BTA6 | BAC ID with insert size and BAC position on BTA6 scaffold [Mb] | ETS_ID | Similarity to bovine genome sequence                                        | Position [Mb]           | Similarity to other transcripts                                              | Similarity to other genome sequences                                                |
|---------------|----------------------------------------------------------------|--------|-----------------------------------------------------------------------------|-------------------------|------------------------------------------------------------------------------|-------------------------------------------------------------------------------------|
| <b>FBNS4</b>  | BBI_750F05243 (99 Kb)<br>NW_001495159.2: 41.414-41.513         | 20835  | NW_001495159.2, KCNIP4 (NM_001076935, exon 5),                              | BTA6: 41.423            | Exon 13 of human KCNIP4                                                      | Intron 4 of human KCNIP4<br>Human genomic contigs, e.g. NW_921665, altern. assembly |
|               |                                                                | 20849  | NW_001495159.2, KCNIP4, exon 2                                              | BTA6: 41.440            | Exon 9 of human KCNIP4                                                       |                                                                                     |
|               |                                                                | 20853  | NW_001495159.2, KCNIP4, intron 1                                            | BTA6: 41.464            |                                                                              |                                                                                     |
|               |                                                                | 20858  | NW_001495159.2, KCNIP4, intron 1                                            | BTA6: 41.495            |                                                                              |                                                                                     |
|               |                                                                | 20837  | NW_001495159.2, KCNIP4, intron 1                                            | BTA6: 41.508            |                                                                              |                                                                                     |
|               |                                                                | 20866  | -----                                                                       | UN                      | 11 bovine ESTs (e.g. DY055462), exons 11 and 12 of human KCNIP4              |                                                                                     |
| <b>BMS382</b> | BBI_750F06108 (110 Kb)<br>NW_001495159.2: 42.091-42.201        | 25626  | NW_001495159.2, 584.6 Kb 5' to KCNIP4                                       | BTA6: 42.107            | Ovine EST EE834255,<br>Bovine predicted transcript hmn 107334 (gnomon model) | Human genomic contigs, e.g. NW_923238, altern. assembly                             |
|               |                                                                | 25624  | NW_001495159.2, 586.2 Kb 5' to KCNIP4                                       | BTA6: 42.109            | Ovine EST EE834255,<br>Bovine predicted transcript hmn 107334 (gnomon model) |                                                                                     |
|               |                                                                | 25316  | NW_001495159.2, 591 Kb 5' to KCNIP4                                         | BTA6: 42.114            | Ovine EST EE834255                                                           |                                                                                     |
|               |                                                                | 25618  | NW_001495159.2, 592.9 Kb 5' to KCNIP4                                       | BTA6: 42.116            | Ovine EST EE834255                                                           |                                                                                     |
|               |                                                                | 25599  | NW_001495159.2, 594.7 Kb 5' to KCNIP4                                       | BTA6: 42.119            | Ovine EST EE834255                                                           |                                                                                     |
|               |                                                                | 25609  | NW_001495159.2, 611.4 Kb 5' to KCNIP4                                       | BTA6: 42.134            | Bovine ESTs DY149610, DY194833, DY1944707 assigned to NW_001495159.2         |                                                                                     |
|               |                                                                | 25315  | NW_001495159.2, 622.5 Kb 5' to KCNIP4                                       | BTA6: 42.145            | Ovine EST EE834255                                                           |                                                                                     |
|               |                                                                | 25319  | NW_001495159.2, 649.2 Kb 5' to KCNIP4                                       | BTA6: 42.172            | Ovine ESTs EE834255 and EE870115                                             |                                                                                     |
|               |                                                                | 25314  | NW_001495159.2, 652.9 Kb 5' to KCNIP4                                       | BTA6: 42.176            | Ovine EST EE834255                                                           |                                                                                     |
|               |                                                                | 25324  | NW_001495159.2, 655.2 Kb 5' to KCNIP4                                       | BTA6: 42.178            | Ovine EST EE834255                                                           |                                                                                     |
|               |                                                                | 25614  | NW_001495159.2, 658.5 Kb 5' to KCNIP4                                       | BTA6: 42.182            |                                                                              |                                                                                     |
|               |                                                                | 25619  | NW_001495159.2, 662.3 Kb 5' to KCNIP4                                       | BTA6: 42.186            |                                                                              |                                                                                     |
|               |                                                                | 25313  | -----                                                                       | UN                      |                                                                              |                                                                                     |
|               |                                                                | 25612  | -----                                                                       | UN                      |                                                                              |                                                                                     |
|               |                                                                | 25613  | -----                                                                       | UN                      |                                                                              |                                                                                     |
| <b>FBN12</b>  | BBI_750M16218 (64 Kb)<br>NW_001495159.2: 43.3825-43.4460       | 20687  | NW_001495159.2, 29.8 Kb 5' to GPR125, (XM_614752.3)                         | BTA6: 43.383            |                                                                              | Human genomic contigs, e.g. NW_921594, NW_922185, altern. assembly                  |
|               |                                                                | 20708  | NW_001495159.2, 44.1 Kb 5' to GPR125, 44.4 Kb 3' to GBA3 (NM_001787544.3)   | BTA6: 43.397            |                                                                              | Human genomic contigs, e.g. NW_922099, altern. assembly                             |
|               |                                                                | 21395  | NW_001495159.2, 63 Kb 5' to GPR125, 25.5 Kb 3' to GBA3                      | BTA6: 43.416            | Bovine predicted transcript hmn 133334 (gnomon model)                        | Human genomic contig, NW_921914, altern. Assembly                                   |
|               |                                                                | 25598  | NW_001495159.2, 70.4 (78.3) Kb 5' to GPR125, 18.1 (10.2) Kb 3' to predicted | BTA6: 43.423 and 43.431 | Bovine predicted transcript hmn 133334 (gnomon model)                        |                                                                                     |

|               |                                                        |       |                                                                                          |                                     |                                                                                                                                                                         |                                                                                                                                                                                                                                                                                                                                                         |
|---------------|--------------------------------------------------------|-------|------------------------------------------------------------------------------------------|-------------------------------------|-------------------------------------------------------------------------------------------------------------------------------------------------------------------------|---------------------------------------------------------------------------------------------------------------------------------------------------------------------------------------------------------------------------------------------------------------------------------------------------------------------------------------------------------|
|               |                                                        |       | GBA3 (XM_)                                                                               |                                     |                                                                                                                                                                         | Mouse genomic contig NT_39305 on MMU5, 107 Kb 5' to Gpr125, 1.29 Mb 3' to pargc1a                                                                                                                                                                                                                                                                       |
|               |                                                        | 20309 | NW_001495159.2, 76 Kb 5' to GPR125, 12.5 Kb 3' to GBA3                                   | BTA6: 43.429                        | Bovine predicted transcript hmm 133334 (gnomon model)<br>Bovine predicted transcript hmm 133334 (gnomon model)<br>Bovine predicted transcript hmm 133334 (gnomon model) | Human genomic contigs, e.g. NW_921594, altern. assembly<br>Human genomic contigs on HSA18 and HSA12                                                                                                                                                                                                                                                     |
|               |                                                        | 20308 | NW_001495159.2, 77 Kb 5' to GPR125, 11.5 Kb 3' to GBA3                                   | BTA6: 43.4301                       |                                                                                                                                                                         |                                                                                                                                                                                                                                                                                                                                                         |
|               |                                                        | 20311 | NW_001495159.2, 77.1 Kb 5' to GPR125, 11.4 Kb 3' to GBA3                                 | BTA6: 43.4302                       |                                                                                                                                                                         |                                                                                                                                                                                                                                                                                                                                                         |
|               |                                                        | 20565 | NW_001495159.2, 79 Kb 5' to GPR125, 9.4 Kb 3' to GBA3                                    | BTA6: 43.432                        |                                                                                                                                                                         |                                                                                                                                                                                                                                                                                                                                                         |
|               |                                                        | 20691 | UN, partiell repetitive                                                                  | UN                                  |                                                                                                                                                                         |                                                                                                                                                                                                                                                                                                                                                         |
| <b>BM143</b>  | BBI_750F22162 (76 Kb)<br>NW_001495167.2: 44.107-44.183 | 21697 | NW_001495167.2                                                                           | BTA6: 44.114                        |                                                                                                                                                                         | Human genomic contig NT_006316 on HSA4, 442 Kb 5' to LOC643751 , 625 Kb 3' to PPARGC1A,<br>Mouse genomic contig NT_39305 on MMU5, 733 Kb 5' to Gpr125, 663 Kb 3' to Ppargc1a<br>Human genomic contigs, e.g. NW_922185, altern. assembly                                                                                                                 |
|               |                                                        | 21696 | NW_001495167.2                                                                           | BTA6: 44.1165 and 44.118            |                                                                                                                                                                         |                                                                                                                                                                                                                                                                                                                                                         |
|               |                                                        | 21688 | NW_001495167.2                                                                           | BTA6: 44.1178                       |                                                                                                                                                                         |                                                                                                                                                                                                                                                                                                                                                         |
|               |                                                        | 20396 | NW_001495167.2                                                                           | BTA6: 44.134                        |                                                                                                                                                                         |                                                                                                                                                                                                                                                                                                                                                         |
|               |                                                        | 21685 | NW_001495167.2                                                                           | BTA6: 44.141                        |                                                                                                                                                                         |                                                                                                                                                                                                                                                                                                                                                         |
|               |                                                        | 20400 | NW_001495167.2                                                                           | BTA6: 44.168                        |                                                                                                                                                                         |                                                                                                                                                                                                                                                                                                                                                         |
|               |                                                        | 20395 | NW_001495167.2                                                                           | BTA6: 44.170                        |                                                                                                                                                                         |                                                                                                                                                                                                                                                                                                                                                         |
|               |                                                        | 21687 | NW_001495167.2                                                                           | BTA6: 44.175                        |                                                                                                                                                                         |                                                                                                                                                                                                                                                                                                                                                         |
| <b>FBNS10</b> | BBI_750J07162 (66 Kb)<br>NW_001495167.2: 45.374-45.440 | 25285 | NW_001495167.2, 554.4 Kb 5' to PPARGC1A (NM_177945.3)                                    | BTA6: 45.393                        |                                                                                                                                                                         | Human genomic contig NT_006316 on HSA4, 544 Kb 5' to PPARGC1A, 37 Kb 3' to LOC729175<br>Human genomic contig NT_006316 on HSA4, 552 Kb 5' to PPARGC1A, 29 Kb 3' to LOC729175<br>Human genomic contig NT_006316 on HSA4, 560 Kb 5' to PPARGC1A, 22 Kb 3' to LOC729175<br>Mouse genomic contig NT_39305 on MMU5, 240 Kb 5' to Ppargc1a, 56 Kb 3' to Dhx15 |
|               |                                                        | 25657 | NW_001495167.2, 77.9 Kb 3' to DHX15 (NM_001098018.3)                                     | BTA6: 45.407                        |                                                                                                                                                                         |                                                                                                                                                                                                                                                                                                                                                         |
|               |                                                        | 25310 | NW_001495167.2, 73.6 Kb 3' to DHX15                                                      | BTA6: 45.411                        |                                                                                                                                                                         |                                                                                                                                                                                                                                                                                                                                                         |
|               |                                                        | 25303 | NW_001495167.2, 580.3 (581.1, 581.5) Kb 5' to PPARGC1A, 65.8 (65.1, 64.7) Kb 3' to DHX15 | BTA6: 45.4191, 45.4198, and 45.4202 |                                                                                                                                                                         |                                                                                                                                                                                                                                                                                                                                                         |
|               |                                                        | 25299 | NW_001495167.2, 59.8 Kb 3' to DHX15                                                      | BTA6: 45.425                        |                                                                                                                                                                         |                                                                                                                                                                                                                                                                                                                                                         |
|               |                                                        | 25292 | NW_001495167.2, 54.6 Kb 3' to DHX15                                                      | BTA6: 45.430                        |                                                                                                                                                                         |                                                                                                                                                                                                                                                                                                                                                         |

|               |                                                                                                    |       |                                                     |                               |                                                                                 |                                                                          |
|---------------|----------------------------------------------------------------------------------------------------|-------|-----------------------------------------------------|-------------------------------|---------------------------------------------------------------------------------|--------------------------------------------------------------------------|
|               |                                                                                                    | 25283 | NW_001495167.2, 49.3 Kb 3' to DHX15                 | BTA6: 45.435                  |                                                                                 |                                                                          |
|               |                                                                                                    | 25294 | NW_001495167.2, 47.8 Kb 3' to DHX15                 | BTA6: 45.437                  | Bovine EST DY067729<br>Bovine predicted transcript hmm<br>183334 (gnomon model) |                                                                          |
| <b>BL1099</b> | BBI_750C04346 (60 Kb)<br>NW_001495169.2: 49.074-49.134                                             | 26271 | NW_001495169.2                                      | BTA6: 49.080                  | Bovine predicted transcript hmm<br>281334 (gnomon model)                        | Human genomic contig<br>NW_922643, altern. assembly                      |
|               |                                                                                                    | 22258 | NW_001495169.2                                      | BTA6: 49.088                  |                                                                                 |                                                                          |
|               |                                                                                                    | 26268 | NW_001495169.2                                      | BTA6: 49.118                  |                                                                                 |                                                                          |
|               |                                                                                                    | 26267 | NW_001495169.2                                      | BTA6: 49.123                  |                                                                                 |                                                                          |
| <b>FBNS13</b> | BBI_750K15348 (865 Kb)<br>NW_001495170.2: 50.439-51.304                                            | 25328 | NW_001495170.2, 228.8 Kb 3' to PCDH7<br>(XM_864701) | BTA6: 51.287                  |                                                                                 |                                                                          |
|               |                                                                                                    | 25329 | NW_001495170.2, 274.5 Kb 3' to PCDH7                | BTA6: 51.241                  |                                                                                 |                                                                          |
|               |                                                                                                    | 25336 | NW_001495170.2, 268.5 Kb 3' to PCDH7                | BTA6: 51.247                  |                                                                                 |                                                                          |
| <b>BMS518</b> | BBI_750E20138 (50 Kb)<br>NW_001495170.2: 51.287-51.337                                             | 25582 | NW_001495170.2, 208.3 (209.0) Kb 3' to<br>PCDH7     | BTA6: 51.3069<br>and 51.3075  |                                                                                 |                                                                          |
|               |                                                                                                    | 25584 | NW_001495170.2, 202.4 Kb 3' to PCDH7,               | BTA6: 51.313                  |                                                                                 |                                                                          |
|               |                                                                                                    | 26352 | NW_001495170.2, 191.1 Kb 3' to PCDH7                | BTA6: 51.3248                 |                                                                                 |                                                                          |
|               |                                                                                                    | 26342 | NW_001495170.2, 191 Kb 3' to PCDH7                  | BTA6: 51.325                  |                                                                                 |                                                                          |
|               |                                                                                                    | 26308 | NW_001495170.2, 184.4 Kb 3' to PCDH7                | BTA6: 51.332                  | Bovine ESTs assigned to a number of<br>chromosomes                              | Human genomic contigs, e.g.<br>NW_921858, altern. assembly               |
| <b>TGLA37</b> | BBI_750E07177 (77 Kb)<br>NW_001495170.2: 52.453-52.530                                             | 16065 | NW_001495170.2, 467.3 Kb 5' to PCDH7                | BTA6: 52.467                  |                                                                                 |                                                                          |
|               |                                                                                                    | 15338 | NW_001495170.2, 514.9 Kb 5' to PCDH7                | BTA6: 52.5145                 |                                                                                 | Human genomic contig<br>NW_921594, altern. assembly                      |
|               |                                                                                                    | 15335 | NW_001495170.2, 516.9 Kb 5' to PCDH7                | BTA6: 52.516                  |                                                                                 |                                                                          |
|               |                                                                                                    | 16062 | NW_001495170.2, 523.2 Kb 5' to PCDH7                | BTA6: 52.523                  |                                                                                 | Human genomic contig<br>NW_921594, altern. assembly                      |
| <b>TGLA37</b> | BBI_750B13346 (72 Kb)<br>NW_001495170.2: 52.458-52.530                                             | 26263 | NW_001495170.2, 469.4 (468.9) Kb 5' to<br>PCDH7     | BTA6: 52.4687<br>and 52.4683) |                                                                                 |                                                                          |
|               |                                                                                                    | 26264 | NW_001495170.2, 524.5 Kb 5' to PCDH7                | BTA6: 52.524                  |                                                                                 |                                                                          |
|               |                                                                                                    | 22268 | NW_001495170.2, 1,013.6 Kb 5' to PCDH7              | BTA6: 53.013                  |                                                                                 | Human genomic contig<br>NW_921789, altern. assembly                      |
|               |                                                                                                    | 22269 | NW_001495170.2, 1,060.3 Kb 5' to PCDH7              | BTA6: 53.059                  |                                                                                 | Human genomic contigs, e.g.<br>NW_921858, NW_921665, altern.<br>assembly |
|               |                                                                                                    | 22277 | NW_001503872.2                                      | UN                            | Bovine predicted transcript hmm<br>2103723 (gnomon model)                       | Mouse genomic contig NT_39606<br>on MMU14, Polr3d                        |
| <b>FBN13</b>  | BBI_750M0258 (198 Kb)<br>NW_001495175.2: 56.090-56.288                                             | 15498 | NW_001495175.2, partial repetitive<br>sequence      | BTA6: 56.100                  |                                                                                 | Human genomic contig<br>NW_921594, altern. assembly                      |
|               |                                                                                                    | 15495 | NW_001495175.2 and NW_001495179.2                   | BTA6: 56.115 and<br>56.253    |                                                                                 | Human genomic contig<br>NW_921914, altern. assembly                      |
|               |                                                                                                    | 14638 | NW_001495179.2                                      | BTA6: 56.278                  |                                                                                 |                                                                          |
| <b>FBN13</b>  | BBI_750B0172 (92/83 or 48/222Kb)<br>NW_001495175.2/NW_001495179.<br>2: 56.128/56.267-56.175/56.350 | 16042 | NW_001495179.2                                      | BTA6: 56.280                  |                                                                                 | Human genomic contig<br>NW_921699, altern. assembly                      |

|               |                                                       |       |                                                    |                                                    |                                                                                                |                                                                                                                                                                                   |
|---------------|-------------------------------------------------------|-------|----------------------------------------------------|----------------------------------------------------|------------------------------------------------------------------------------------------------|-----------------------------------------------------------------------------------------------------------------------------------------------------------------------------------|
|               |                                                       | 16037 | NW_00149517.2                                      | BTA6: 56.2878<br>and 56.2883                       |                                                                                                | Human genomic contig<br>NW_922974, altern. assembly                                                                                                                               |
|               |                                                       | 15239 | NW_001495179.2                                     | BTA6: 56.289                                       |                                                                                                |                                                                                                                                                                                   |
|               |                                                       | 15246 | NW_001495179.2                                     | BTA6:56.292                                        | Bovine ESTs DN840825, DN845774                                                                 |                                                                                                                                                                                   |
|               |                                                       | 16035 | NW_001495179.2                                     | BTA6: 56.302                                       | Porcine EST EW1959132                                                                          |                                                                                                                                                                                   |
|               |                                                       | 16667 | NW_001495179.2                                     | BTA6: 56.304                                       | Bovine predicted transcript hmm<br>37344 (gnomon model) and<br>hypothetical locus LOC100140872 | Human genomic contigs on HSA10<br>and HSA8, PHYHIPL<br>Mouse genomic contigs on<br>MMU10 and MMU14, Phyhipl<br>Human genomic contigs<br>NW_921665, NW_921517, altern.<br>assembly |
|               |                                                       | 16041 | -----                                              | UN                                                 |                                                                                                |                                                                                                                                                                                   |
| <b>BM4528</b> | BBI_750A1391 (33 Kb)<br>NW_001495186.2: 65.832-65.865 | 20748 | NW_001495186.2, 8.0 Kb 5' to KCTD8,<br>(XM_590048) | BTA6: 65.588                                       | Bovine predicted transcript hmm<br>325344 (gnomon model)                                       |                                                                                                                                                                                   |
|               |                                                       | 20751 | NW_001495186.2, KCTD8, intron                      | BTA6: 65.835                                       |                                                                                                | Human genomic contigs on HSA6,<br>HSA12, HSA5<br>Human genomic contig,<br>NW_922610, altern. assembly,<br>pred Hmm438037                                                          |
|               |                                                       | 20746 | NW_001495186.2, KCTD8, intron                      | BTA6: 65.853                                       |                                                                                                |                                                                                                                                                                                   |
|               |                                                       | 23447 | NW_001495186.2, KCTD8, intron                      | BTA6: 65.8545                                      |                                                                                                |                                                                                                                                                                                   |
|               |                                                       | 23435 | NW_001495186.2, KCTD8, intron                      | BTA6: 65.860                                       |                                                                                                | Human genomic contigs, e.g.<br>NW_922226, altern. assembly                                                                                                                        |
|               |                                                       | 20758 | NW_001495186.2, KCTD8, intron                      | BTA6: 65.865                                       |                                                                                                | Human genomic contigs, e.g.<br>NW_921858,, NW_921665 altern.<br>assembly                                                                                                          |
|               |                                                       | 20749 | NW_001495186.2, KCTD8, intron                      | BTA6: 65.879                                       |                                                                                                |                                                                                                                                                                                   |
|               |                                                       | 23438 | NW_001495186.2, 2.0 Kb 5' to KCTD8                 | BTA6: 65.882                                       | Bovine predicted transcript hmm<br>325344 (gnomon model)                                       |                                                                                                                                                                                   |
|               |                                                       | 23437 | NW_001503872.1                                     | UN                                                 | Bovine predicted transcript hmm<br>2102733 (gnomon model) and<br>hypothetical locus LOC788223  | Mouse genomic contig NT_39606<br>on MMU14, Pol3rd                                                                                                                                 |
|               |                                                       | 23434 | NW_001502282, NW_001501795,<br>NW_001495173.1      | UN<br>BTA6:46.99                                   | Repetitive motifs in bovine ESTs<br>assigned to multiple chromosomes                           | Human genomic contigs, e.g.<br>NW_921858,, NW_921665 altern.<br>assembly                                                                                                          |
| <b>FBN14</b>  | BBI_750C1821 (83 Kb)<br>NW_001495201.2: 78.415-78.498 | 16053 | NW_001495201.2                                     | BTA6: 78.430                                       |                                                                                                |                                                                                                                                                                                   |
|               |                                                       | 16662 | NW_001495201.2                                     | BTA6: 78.435                                       |                                                                                                | Human genomic contigs, e.g.<br>NW_921665 and Mouse genomic<br>contig NW_001037873, altern.<br>assemblies                                                                          |
|               |                                                       | 16048 | NW_001495201.2                                     | BTA6: 78.448                                       |                                                                                                | Human genomic contigs, e.g.<br>NW_921665 altern. assembly                                                                                                                         |
|               |                                                       | 15328 | NW_001495201.2                                     | BTA6:<br>78.4574/78.4576<br>and<br>78.4612/78.4614 |                                                                                                | Human genomic contig<br>NT_022778 on HSA4, 144 Kb 5' to<br>LOC644419, 1.2 Mb 3' to<br>LOC644484                                                                                   |
|               |                                                       | 16050 | NW_001495201.2                                     | BTA6: 78.471                                       |                                                                                                | Human genomic contigs, e.g.<br>NW_922185, altern. assembly                                                                                                                        |
